# Supplementary material for: Self-diffusion, velocity cross-correlation, distinct diffusion and resistance coefficients of the ionic liquid [BMIM][Tf2N] at high pressure
Source: Royal Society of Chemistry journal article supplement (doi:10.1039/c5cp04277a), 2015-01-01
Supplement: c5cp04277a1.pdf [file c5cp04277a1.pdf]

## Supplementary Information for

Self-diffusion, Velocity Cross-correlation Coefficients and  
Distinct Diffusion Coefficients of the Ionic Liquid  
[BMIM][Tf<sub>2</sub>N] at High Pressure.

*Phys. Chem. Chem. Phys.* 2015, **17**, 0000-0000.

**Kenneth R. Harris and Mitsuhiro Kanakubo**

[k.harris@adfa.edu.au](mailto:k.harris@adfa.edu.au)

[m-kanakubo@aist.go.jp](mailto:m-kanakubo@aist.go.jp)

Table S1a. Densities and expansivities of [OMIM][Tf<sub>2</sub>N] at 0.1 MPa.\*†

|             | sample 1<br>Canberra<br>densimeter | sample 2<br>Sendai<br>densimeter |                                           |
|-------------|------------------------------------|----------------------------------|-------------------------------------------|
| <i>T</i> /K | $\rho$ /g·cm <sup>-3</sup>         | $\rho$ /g·cm <sup>-3</sup>       | 10 <sup>3</sup> $\alpha$ /K <sup>-1</sup> |
| 273.15      | 1.34301                            | 1.34316                          | 0.673                                     |
| 278.15      |                                    | 1.33865                          | 0.673                                     |
| 283.15      | 1.33391                            | 1.33414                          | 0.673                                     |
| 288.15      |                                    | 1.32963                          | 0.673                                     |
| 293.15      | 1.32500                            | 1.32513                          | 0.673                                     |
| 298.15      | 1.32066                            | 1.32063                          | 0.674                                     |
| 303.15      | 1.31623                            | 1.31617                          | 0.674                                     |
| 313.15      | 1.30745                            | 1.30731                          | 0.674                                     |
| 323.15      | 1.29870                            | 1.29853                          | 0.674                                     |
| 333.15      | 1.28998                            | 1.28981                          | 0.674                                     |
| 343.15      | 1.28130                            | 1.28115                          | 0.674                                     |
| 353.15      | 1.27265                            | 1.27255                          | 0.674                                     |
| 363.15      | 1.26404                            | 1.26400                          | 0.674                                     |

\* Measured with DMA 5000 vibrating tube densimeters

† Standard uncertainties are  $u(T) = 0.01$  K,  $u(\rho) = 0.02\%$ ,  $u(\alpha) = 0.015 \cdot 10^{-3}$  K<sup>-1</sup>.

Table S1b. Densities and expansivities of [BMIM][Tf<sub>2</sub>N] and [HMIM][Tf<sub>2</sub>N] at 0.1 MPa.<sup>\*,†</sup>

| <i>T</i> /K | [BMIM][Tf <sub>2</sub> N]          |                             | [HMIM][Tf <sub>2</sub> N]          |                             |
|-------------|------------------------------------|-----------------------------|------------------------------------|-----------------------------|
|             | $\rho/\text{g}\cdot\text{cm}^{-3}$ | $10^3 \alpha/\text{K}^{-1}$ | $\rho/\text{g}\cdot\text{cm}^{-3}$ | $10^3 \alpha/\text{K}^{-1}$ |
| 238.15      |                                    |                             | 1.4289                             | 0.686                       |
| 243.15      | 1.4904                             | 0.680                       | 1.4243                             | 0.685                       |
| 248.15      | 1.4854                             | 0.679                       | 1.4197                             | 0.684                       |
| 253.15      | 1.4803                             | 0.678                       | 1.4149                             | 0.683                       |
| 258.15      | 1.4752                             | 0.677                       | 1.4100                             | 0.682                       |
| 263.15      | 1.4701                             | 0.676                       | 1.4051                             | 0.682                       |
| 268.15      | 1.4651                             | 0.675                       | 1.4001                             | 0.681                       |
| 273.15      | 1.4602                             | 0.674                       | 1.3952                             | 0.680                       |
| 278.15      | 1.4554                             | 0.673                       | 1.3905                             | 0.679                       |
| 283.15      | 1.4507                             | 0.672                       | 1.3858                             | 0.678                       |
| 288.15      | 1.4457                             | 0.671                       | 1.3812                             | 0.677                       |
| 293.15      | 1.4409                             | 0.670                       | 1.3766                             | 0.676                       |
| 298.15      | 1.4360                             | 0.669                       | 1.3720                             | 0.675                       |
| 303.15      | 1.4313                             | 0.668                       | 1.3675                             | 0.674                       |
| 313.15      | 1.4218                             | 0.666                       | 1.3584                             | 0.671                       |
| 323.15      | 1.4124                             | 0.664                       | 1.3493                             | 0.669                       |
| 333.15      | 1.4030                             | 0.661                       | 1.3403                             | 0.667                       |
| 343.15      | 1.3938                             | 0.659                       | 1.3313                             | 0.665                       |
| 353.15      | 1.3846                             | 0.656                       | 1.3224                             | 0.662                       |
| 363.15      | 1.3755                             | 0.654                       | 1.3137                             | 0.660                       |

\* Measured with the vibrating tube densimeter built into the Stabinger viscometer

† Standard uncertainties are  $u(T, T > 288.15 \text{ K}) = 0.02 \text{ K}$ ,  $u(T, T < 288.15 \text{ K}) = 0.05 \text{ K}$ ,  $u(\rho) = 0.04\%$ ,  $u(\alpha, [\text{BMIM}][\text{Tf}_2\text{N}]) = 0.012 \cdot 10^{-3} \text{ K}^{-1}$ ,  $u(\alpha, [\text{HMIM}][\text{Tf}_2\text{N}]) = 0.020 \cdot 10^{-3} \text{ K}^{-1}$ .

Table S2. Conductivities of [BMIM][Tf<sub>2</sub>N], [HMIM][Tf<sub>2</sub>N] and [OMIM][Tf<sub>2</sub>N] at 0.1 MPa.

| [HMIM][Tf <sub>2</sub> N] <sup>*</sup> |                             |                                                     | [OMIM][Tf <sub>2</sub> N] |                             |                                                     |
|----------------------------------------|-----------------------------|-----------------------------------------------------|---------------------------|-----------------------------|-----------------------------------------------------|
| <i>T</i> / K                           | $\kappa$ /S·m <sup>-1</sup> | $\Lambda$ /<br>μS·m <sup>2</sup> ·mol <sup>-1</sup> | <i>T</i> / K              | $\kappa$ /S·m <sup>-1</sup> | $\Lambda$ /<br>μS·m <sup>2</sup> ·mol <sup>-1</sup> |
| 243.48                                 | 0.003937                    | 1.237                                               | 273.15                    | 0.03083                     | 10.92                                               |
| 253.30                                 | 0.01133                     | 3.584                                               | 278.15                    | 0.04320                     | 15.35                                               |
| 263.59                                 | 0.02791                     | 8.892                                               | 283.15                    | 0.05895                     | 21.01                                               |
| 273.15                                 | 0.05621                     | 18.02                                               | 288.15                    | 0.07844                     | 28.05                                               |
| 273.36                                 | 0.05675                     | 18.20                                               | 293.15                    | 0.1023                      | 36.69                                               |
| 278.15                                 | 0.07724                     | 24.85                                               | 298.15                    | 0.1306                      | 47.04                                               |
| 283.15                                 | 0.1034                      | 33.39                                               | 303.15                    | 0.1639                      | 59.21                                               |
| 288.15                                 | 0.1354                      | 43.85                                               | 313.15                    | 0.2463                      | 89.57                                               |
| 293.03                                 | 0.1715                      | 55.73                                               | 323.15                    | 0.3512                      | 128.6                                               |
| 293.15                                 | 0.1732                      | 56.30                                               | 333.15                    | 0.4785                      | 176.4                                               |
| 298.15                                 | 0.2174                      | 70.87                                               | 343.15                    | 0.6271                      | 232.7                                               |
| 303.15                                 | 0.2690                      | 88.01                                               | 353.15                    | 0.8009                      | 299.2                                               |
| 313.15                                 | 0.3926                      | 129.3                                               | [BMIM][Tf <sub>2</sub> N] |                             |                                                     |
| 323.15                                 | 0.5446                      | 180.6                                               | 242.82                    | 0.009161                    | 2.577                                               |
| 333.15                                 | 0.7234                      | 241.5                                               | 252.87                    | 0.02555                     | 7.236                                               |
| 343.15                                 | 0.9311                      | 312.9                                               | 263.49                    | 0.06088                     | 17.37                                               |
| 353.15                                 | 1.1687                      | 395.4                                               | 273.15                    | 0.1159                      | 33.27                                               |
|                                        |                             |                                                     | 294.15                    | 0.3362                      | 97.90                                               |

\* Densities used to calculate  $\Lambda$  were taken from ref. 7.  
22 July 2015

Table S3. Viscosities of [HMIM][Tf<sub>2</sub>N] at 0.1 MPa: falling body viscometer. <sup>\*,†</sup>

| $T / \text{K}$ | $t / \text{s}^{\ddagger}$ | $V / \text{cm}^3 \cdot \text{mol}^{-1}$ | $\eta / \text{mPa} \cdot \text{s}$ | $T / \text{K}$ | $t / \text{s}$ | $V / \text{cm}^3 \cdot \text{mol}^{-1}$ | $\eta / \text{mPa} \cdot \text{s}$ |
|----------------|---------------------------|-----------------------------------------|------------------------------------|----------------|----------------|-----------------------------------------|------------------------------------|
| 273.15         | 924.1                     | 320.68                                  | 297.8                              | 323.15         | 80.27          | 331.56                                  | 26.01                              |
| 273.15         | 929.7                     | 320.68                                  | 299.6                              | 323.15         | 80.23          | 331.56                                  | 26.00                              |
| 278.15         | 658.6                     | 321.74                                  | 212.4                              | 323.15         | 78.58          | 331.56                                  | 25.47                              |
| 278.15         | 661.7                     | 321.74                                  | 213.4                              | 323.15         | 78.56          | 331.56                                  | 25.46                              |
| 283.15         | 486.4                     | 322.82                                  | 156.9                              | 323.15         | 946.0          | 331.56                                  | 25.82*                             |
| 283.15         | 485.7                     | 322.82                                  | 156.7                              | 333.15         | 58.18          | 333.80                                  | 18.88                              |
| 288.15         | 358.2                     | 323.89                                  | 115.6                              | 333.15         | 58.07          | 333.80                                  | 18.84                              |
| 288.15         | 358.0                     | 323.89                                  | 115.6                              | 333.15         | 688.6          | 333.80                                  | 18.81*                             |
| 293.15         | 277.9                     | 324.97                                  | 89.76                              | 343.15         | 44.06          | 336.05                                  | 14.31                              |
| 293.15         | 277.8                     | 324.97                                  | 89.73                              | 343.15         | 44.85          | 336.05                                  | 14.57                              |
| 298.15         | 218.8                     | 326.06                                  | 70.71                              | 343.15         | 44.51          | 336.05                                  | 14.46                              |
| 298.15         | 218.1                     | 326.06                                  | 70.49                              | 343.15         | 513.1          | 336.05                                  | 14.03*                             |
| 298.15         | 216.6                     | 326.06                                  | 70.02                              | 343.15         | 515.3          | 336.05                                  | 14.09*                             |
| 298.15         | 217.3                     | 326.06                                  | 70.24                              | 348.15         | 448.1          | 337.19                                  | 12.26*                             |
| 303.15         | 173.8                     | 327.15                                  | 56.19                              | 348.15         | 447.3          | 337.19                                  | 12.24*                             |
| 303.15         | 174.9                     | 327.15                                  | 56.55                              | 353.15         | 398.6          | 338.33                                  | 10.91*                             |
| 313.15         | 113.9                     | 329.35                                  | 36.86                              | 353.15         | 401.9          | 338.33                                  | 11.00*                             |
| 313.15         | 113.1                     | 329.35                                  | 36.60                              | 363.15         | 319.6          | 340.62                                  | 8.760*                             |
|                |                           |                                         |                                    | 363.15         | 319.2          | 340.62                                  | 8.749*                             |

\* Most data were obtained with a sinker of a nominal diameter of 6.0 mm: those marked \* were obtained with one 6.3 mm in diameter.

† Standard uncertainties  $u$  are  $u(T) = 0.01 \text{ K}$ ,  $u(p) = 0.2 \text{ MPa}$  above 0.1 MPa,  $u(t) = 0.1\%$ ,  $u(\rho/\rho_s) = 0.3\%$ ; combined expanded uncertainty for the viscosity,  $U_c(\eta) = 2\%$ .

‡ Fall time  
22 July 2015

Table S4. Viscosities of [BMIM][Tf<sub>2</sub>N], [HMIM][Tf<sub>2</sub>N] and [OMIM][Tf<sub>2</sub>N] at 0.1 MPa: Stabinger rotating cylinder viscometer.

| [BMIM][Tf <sub>2</sub> N] |               | [HMIM][Tf <sub>2</sub> N] |               | [OMIM][Tf <sub>2</sub> N] |               |
|---------------------------|---------------|---------------------------|---------------|---------------------------|---------------|
| <i>T</i> /K               | $\eta$ /mPa·s | <i>T</i> /K               | $\eta$ /mPa·s | <i>T</i> /K               | $\eta$ /mPa·s |
| 243.15                    | 2698*         | 238.15                    | 9277*         | 273.15                    | 426.7         |
| 248.15                    | 1556*         | 243.15                    | 4800*         | 278.15                    | 300.0         |
| 253.15                    | 948.1         | 248.15                    | 2746          | 283.15                    | 216.5         |
| 258.15                    | 606.1         | 253.15                    | 1613          | 288.15                    | 160.4         |
| 263.15                    | 402.5         | 258.15                    | 998.8         | 293.15                    | 121.3         |
| 268.15                    | 277.3         | 263.15                    | 648.8         | 293.15                    | 121.3         |
| 273.15                    | 197.3         | 268.15                    | 432.3         | 293.15                    | 121.4         |
| 278.15                    | 144.5         | 273.15                    | 300.0         | 298.15                    | 93.60         |
| 283.15                    | 108.5         | 278.15                    | 213.9         | 303.15                    | 73.55         |
| 288.15                    | 83.44         | 283.15                    | 157.1         | 313.15                    | 47.71         |
| 293.15                    | 65.44         | 288.15                    | 118.2         | 323.15                    | 32.68         |
| 298.15                    | 51.98         | 293.15                    | 90.77         | 333.15                    | 23.42         |
| 303.15                    | 42.21         | 298.15                    | 70.57         | 343.15                    | 17.43         |
| 313.15                    | 29.05         | 303.15                    | 56.34         | 353.15                    | 13.39         |
| 323.15                    | 20.98         | 313.15                    | 37.46         | 363.15                    | 10.56         |
| 333.15                    | 15.74         | 323.15                    | 26.29         |                           |               |
| 343.15                    | 12.20         | 333.15                    | 19.22         |                           |               |
| 353.15                    | 9.711         | 343.15                    | 14.53         |                           |               |
| 363.15                    | 7.909         | 353.15                    | 11.34         |                           |               |
|                           |               | 363.15                    | 9.101         |                           |               |

\* These points were omitted from the VFT fits due to large negative residuals. The value of 9277 mPa·s is beyond the calibration limit, 7076 mPa·s : see experimental section.

Table S5. Ion Self-diffusion Coefficients for [BMIM][Tf<sub>2</sub>N]

| [BMIM] <sup>+</sup> |             |               |                                                                           | [Tf <sub>2</sub> N] <sup>-</sup> |             |               |                                                                           |
|---------------------|-------------|---------------|---------------------------------------------------------------------------|----------------------------------|-------------|---------------|---------------------------------------------------------------------------|
| <i>T</i> /°C        | <i>T</i> /K | <i>p</i> /MPa | 10 <sup>12</sup> <i>D</i> <sub>+</sub><br>/m <sup>2</sup> s <sup>-1</sup> | <i>T</i> /°C                     | <i>T</i> /K | <i>p</i> /MPa | 10 <sup>12</sup> <i>D</i> <sub>-</sub><br>/m <sup>2</sup> s <sup>-1</sup> |
| 10.47               | 283.62      | 0.1           | 13.85                                                                     | 15.10                            | 288.25      | 0.1           | 13.05                                                                     |
| 10.47               | 283.62      | 0.1           | 13.85                                                                     | 15.10                            | 288.25      | 0.1           | 13.01                                                                     |
| 10.47               | 283.62      | 0.1           | 13.80                                                                     | 20.11                            | 293.26      | 0.1           | 16.64                                                                     |
| 19.99               | 293.14      | 0.1           | 21.74                                                                     | 20.13                            | 293.28      | 0.1           | 16.82                                                                     |
| 19.99               | 293.14      | 0.1           | 21.83                                                                     | 24.97                            | 298.12      | 0.1           | 20.86                                                                     |
| 19.99               | 293.14      | 0.1           | 21.39                                                                     | 25.11                            | 298.26      | 0.1           | 20.48                                                                     |
| 19.99               | 293.14      | 0.1           | 21.48                                                                     | 25.29                            | 298.44      | 0.1           | 21.30                                                                     |
| 20.23               | 293.38      | 0.1           | 22.31                                                                     | 25.37                            | 298.52      | 0.1           | 21.23                                                                     |
| 20.24               | 293.39      | 0.1           | 22.48                                                                     | 25.21                            | 298.36      | 9.5           | 19.04                                                                     |
| 25.01               | 298.16      | 0.1           | 27.54                                                                     | 25.27                            | 298.42      | 19.0          | 17.37                                                                     |
| 25.06               | 298.21      | 0.1           | 27.26                                                                     | 25.24                            | 298.39      | 25.0          | 16.18                                                                     |
| 25.13               | 298.28      | 0.1           | 27.46                                                                     | 29.99                            | 303.14      | 0.1           | 26.54                                                                     |
| 25.16               | 298.31      | 0.1           | 27.28                                                                     | 30.21                            | 303.36      | 0.1           | 26.35                                                                     |
| 25.30               | 298.45      | 0.1           | 27.99                                                                     | 30.22                            | 303.37      | 0.1           | 26.03                                                                     |
| 25.31               | 298.46      | 0.1           | 26.74                                                                     | 40.20                            | 313.35      | 0.1           | 38.83                                                                     |
| 25.39               | 298.54      | 0.1           | 28.03                                                                     | 40.22                            | 313.37      | 0.1           | 39.04                                                                     |
| 25.14               | 298.29      | 5.0           | 26.46                                                                     | 48.81                            | 321.96      | 0.1           | 53.49                                                                     |
| 25.12               | 298.27      | 10.0          | 24.40                                                                     | 49.57                            | 322.72      | 0.1           | 53.91                                                                     |
| 25.12               | 298.27      | 20.0          | 22.27                                                                     | 49.85                            | 323.00      | 0.1           | 53.54                                                                     |
| 25.06               | 298.21      | 40.0          | 17.40                                                                     | 49.86                            | 323.01      | 0.1           | 54.28                                                                     |
| 30.01               | 303.16      | 0.1           | 34.07                                                                     | 49.91                            | 323.06      | 0.1           | 52.59                                                                     |
| 30.01               | 303.16      | 0.1           | 33.78                                                                     | 49.93                            | 323.08      | 0.1           | 53.94                                                                     |
| 30.03               | 303.18      | 0.1           | 34.11                                                                     | 49.94                            | 323.09      | 0.1           | 55.06                                                                     |
| 30.08               | 303.23      | 0.1           | 33.56                                                                     | 49.94                            | 323.09      | 0.1           | 54.19                                                                     |
| 39.92               | 313.07      | 0.1           | 49.34                                                                     | 50.03                            | 323.18      | 0.1           | 54.94                                                                     |
| 39.98               | 313.13      | 0.1           | 49.20                                                                     | 50.15                            | 323.30      | 0.1           | 52.94                                                                     |
| 40.01               | 313.16      | 0.1           | 48.32                                                                     | 50.70                            | 323.85      | 0.1           | 54.79                                                                     |

|       |        |       |       |       |        |       |       |
|-------|--------|-------|-------|-------|--------|-------|-------|
| 40.07 | 313.22 | 0.1   | 48.27 | 49.90 | 323.05 | 16.0  | 46.97 |
| 49.83 | 322.98 | 0.1   | 68.32 | 48.80 | 321.95 | 25.0  | 42.37 |
| 49.84 | 322.99 | 0.1   | 65.94 | 50.06 | 323.21 | 25.0  | 42.65 |
| 49.94 | 323.09 | 0.1   | 70.15 | 50.16 | 323.31 | 30.0  | 39.85 |
| 49.95 | 323.10 | 0.1   | 69.65 | 50.16 | 323.31 | 30.0  | 39.76 |
| 49.96 | 323.11 | 0.1   | 68.31 | 50.10 | 323.25 | 35.0  | 38.60 |
| 50.06 | 323.21 | 0.1   | 69.16 | 50.09 | 323.24 | 48.5  | 34.24 |
| 50.08 | 323.23 | 0.1   | 68.26 | 50.07 | 323.22 | 49.0  | 35.17 |
| 50.09 | 323.24 | 0.1   | 68.44 | 50.30 | 323.45 | 50.0  | 33.82 |
| 50.10 | 323.25 | 0.1   | 70.14 | 50.33 | 323.48 | 75.0  | 27.82 |
| 50.10 | 323.25 | 0.1   | 67.93 | 50.28 | 323.43 | 100.0 | 23.06 |
| 50.10 | 323.25 | 0.1   | 68.93 | 50.31 | 323.46 | 100.0 | 22.97 |
| 50.11 | 323.26 | 0.1   | 68.17 | 59.91 | 333.06 | 0.1   | 74.07 |
| 50.12 | 323.27 | 0.1   | 67.58 | 59.94 | 333.09 | 0.1   | 73.02 |
| 50.07 | 323.22 | 12.5  | 61.10 | 64.93 | 338.08 | 0.1   | 85.40 |
| 50.10 | 323.25 | 12.5  | 60.75 | 64.97 | 338.12 | 0.1   | 82.66 |
| 50.06 | 323.21 | 25.0  | 54.68 | 64.97 | 338.12 | 0.1   | 83.87 |
| 50.13 | 323.28 | 37.5  | 48.90 | 65.00 | 338.15 | 0.1   | 85.45 |
| 50.13 | 323.28 | 50.0  | 44.08 | 65.09 | 338.24 | 0.1   | 84.60 |
| 50.14 | 323.29 | 75.0  | 35.58 | 65.12 | 338.27 | 0.1   | 84.20 |
| 50.14 | 323.29 | 100.0 | 30.02 | 64.97 | 338.12 | 9.4   | 76.83 |
| 50.10 | 323.25 | 125.0 | 24.21 | 64.97 | 338.12 | 10.5  | 76.25 |
| 50.08 | 323.23 | 150.0 | 19.43 | 64.97 | 338.12 | 24.3  | 67.73 |
| 50.06 | 323.21 | 175.0 | 15.85 | 65.04 | 338.19 | 25.0  | 67.83 |
| 59.93 | 333.08 | 0.1   | 91.86 | 64.98 | 338.13 | 49.0  | 55.65 |
| 59.93 | 333.08 | 0.1   | 92.49 | 64.98 | 338.13 | 50.0  | 55.04 |
| 69.97 | 343.12 | 0.1   | 122.3 | 64.98 | 338.13 | 74.3  | 45.86 |
| 69.97 | 343.12 | 0.1   | 121.7 | 64.98 | 338.13 | 75.0  | 44.86 |
| 69.98 | 343.13 | 0.1   | 122.9 | 64.98 | 338.13 | 99.8  | 37.21 |
| 74.51 | 347.66 | 0.1   | 137.0 | 65.01 | 338.16 | 100.5 | 37.33 |
| 74.67 | 347.82 | 0.1   | 136.7 | 65.01 | 338.16 | 124.6 | 31.47 |
| 74.73 | 347.88 | 0.1   | 138.1 | 65.01 | 338.16 | 124.7 | 30.74 |
| 74.76 | 347.91 | 0.1   | 138.1 | 65.00 | 338.15 | 150.2 | 26.17 |



|       |        |       |       |       |        |       |       |
|-------|--------|-------|-------|-------|--------|-------|-------|
| 74.88 | 348.03 | 0.1   | 134.5 | 65.01 | 338.16 | 150.5 | 25.94 |
| 74.88 | 348.03 | 0.1   | 135.3 | 64.99 | 338.14 | 174.2 | 22.31 |
| 74.93 | 348.08 | 0.1   | 136.4 | 65.00 | 338.15 | 175.0 | 22.21 |
| 74.93 | 348.08 | 0.1   | 137.0 | 65.00 | 338.15 | 200.0 | 18.79 |
| 74.93 | 348.08 | 0.1   | 133.5 | 65.01 | 338.16 | 200.0 | 18.88 |
| 74.93 | 348.08 | 0.1   | 134.1 | 70.10 | 343.25 | 0.1   | 97.01 |
| 74.95 | 348.10 | 0.1   | 134.5 | 70.13 | 343.28 | 0.1   | 97.01 |
| 74.95 | 348.10 | 0.1   | 134.3 | 74.73 | 347.88 | 0.1   | 113.4 |
| 74.98 | 348.13 | 0.1   | 136.1 | 74.74 | 347.89 | 0.1   | 108.4 |
| 74.98 | 348.13 | 0.1   | 136.7 | 74.75 | 347.90 | 0.1   | 110.7 |
| 75.00 | 348.15 | 0.1   | 134.3 | 74.99 | 348.14 | 0.1   | 109.6 |
| 75.00 | 348.15 | 0.1   | 134.9 | 75.07 | 348.22 | 0.1   | 109.3 |
| 75.02 | 348.17 | 0.1   | 141.0 | 75.09 | 348.24 | 0.1   | 109.9 |
| 75.02 | 348.17 | 0.1   | 141.6 | 74.78 | 347.93 | 15.0  | 98.66 |
| 75.02 | 348.17 | 0.1   | 140.2 | 74.73 | 347.88 | 29.0  | 89.66 |
| 75.02 | 348.17 | 0.1   | 140.8 | 74.83 | 347.98 | 50.0  | 76.39 |
| 75.12 | 348.27 | 0.1   | 138.0 | 74.83 | 347.98 | 75.0  | 63.62 |
| 74.77 | 347.92 | 25.0  | 109.6 | 74.85 | 348.00 | 100.0 | 52.37 |
| 74.99 | 348.14 | 25.0  | 113.4 | 74.84 | 347.99 | 125.0 | 44.09 |
| 75.00 | 348.15 | 37.5  | 102.5 | 74.84 | 347.99 | 150.0 | 37.34 |
| 74.83 | 347.98 | 48.0  | 95.14 | 74.76 | 347.91 | 152.5 | 37.76 |
| 75.00 | 348.15 | 50.0  | 93.74 | 74.82 | 347.97 | 175.0 | 32.62 |
| 75.01 | 348.16 | 75.0  | 78.44 | 74.81 | 347.96 | 200.0 | 27.93 |
| 75.15 | 348.30 | 77.5  | 78.83 | 74.81 | 347.96 | 224.0 | 24.20 |
| 75.15 | 348.30 | 97.0  | 68.21 | 74.80 | 347.95 | 248.5 | 21.34 |
| 74.87 | 348.02 | 99.0  | 67.41 | 74.81 | 347.96 | 249.5 | 20.73 |
| 75.01 | 348.16 | 100.0 | 65.18 | 80.20 | 353.35 | 0.1   | 121.9 |
| 75.16 | 348.31 | 127.5 | 55.94 | 80.21 | 353.36 | 0.1   | 122.0 |
| 75.16 | 348.31 | 150.0 | 48.16 | 90.33 | 363.48 | 0.1   | 157.5 |
| 75.17 | 348.32 | 176.0 | 40.61 |       |        |       |       |
| 75.17 | 348.32 | 197.0 | 35.58 |       |        |       |       |
| 75.16 | 348.31 | 200.5 | 34.73 |       |        |       |       |
| 75.15 | 348.30 | 226.5 | 29.58 |       |        |       |       |

|       |        |       |       |  |  |  |  |
|-------|--------|-------|-------|--|--|--|--|
| 75.17 | 348.32 | 249.0 | 25.46 |  |  |  |  |
| 75.15 | 348.30 | 274.0 | 22.01 |  |  |  |  |
| 75.16 | 348.31 | 275.0 | 21.72 |  |  |  |  |
| 79.76 | 352.91 | 0.1   | 155.7 |  |  |  |  |
| 79.78 | 352.93 | 0.1   | 154.6 |  |  |  |  |
| 89.03 | 362.18 | 0.1   | 194.2 |  |  |  |  |
| 89.17 | 362.32 | 0.1   | 193.5 |  |  |  |  |

Table S6. Ion Self-diffusion Coefficients for [EMIM][Tf<sub>2</sub>N], [HMIM][Tf<sub>2</sub>N] and [OMIM][Tf<sub>2</sub>N] at 0.1 MPa

| [EMIM][Tf <sub>2</sub> N] |             |                                                                           | [HMIM][Tf <sub>2</sub> N] |             |                                                                           | [OMIM][Tf <sub>2</sub> N] |             |                                                                           |
|---------------------------|-------------|---------------------------------------------------------------------------|---------------------------|-------------|---------------------------------------------------------------------------|---------------------------|-------------|---------------------------------------------------------------------------|
| <i>T</i> / °C             | <i>T</i> /K | 10 <sup>12</sup> <i>D</i> <sub>+</sub><br>/m <sup>2</sup> s <sup>-1</sup> | <i>T</i> / °C             | <i>T</i> /K | 10 <sup>12</sup> <i>D</i> <sub>+</sub><br>/m <sup>2</sup> s <sup>-1</sup> | <i>T</i> / °C             | <i>T</i> /K | 10 <sup>12</sup> <i>D</i> <sub>+</sub><br>/m <sup>2</sup> s <sup>-1</sup> |
| -4.88                     | 268.27      | 13.95                                                                     | 20.15                     | 293.30      | 13.32                                                                     | 25.00                     | 298.15      | 12.28                                                                     |
| -4.85                     | 268.30      | 13.92                                                                     | 20.16                     | 293.31      | 13.28                                                                     | 25.10                     | 298.25      | 12.38                                                                     |
| 0.24                      | 273.39      | 18.28                                                                     | 25.01                     | 298.16      | 17.78                                                                     | 29.97                     | 303.12      | 15.31                                                                     |
| 0.30                      | 273.45      | 18.21                                                                     | 25.05                     | 298.20      | 17.70                                                                     | 30.06                     | 303.21      | 15.48                                                                     |
| 10.14                     | 283.29      | 29.13                                                                     | 25.07                     | 298.22      | 16.84                                                                     | 40.07                     | 313.22      | 24.01                                                                     |
| 10.20                     | 283.35      | 30.20                                                                     | 25.08                     | 298.23      | 17.40                                                                     | 40.13                     | 313.28      | 23.69                                                                     |
| 10.24                     | 283.39      | 29.32                                                                     | 30.05                     | 303.20      | 22.38                                                                     | 49.92                     | 323.07      | 35.42                                                                     |
| 20.07                     | 293.22      | 43.98                                                                     | 30.09                     | 303.24      | 22.14                                                                     | 49.94                     | 323.09      | 35.74                                                                     |
| 20.14                     | 293.29      | 43.30                                                                     | 39.93                     | 313.08      | 33.48                                                                     | 50.09                     | 323.24      | 35.14                                                                     |
| 25.15                     | 298.30      | 51.48                                                                     | 39.95                     | 313.10      | 34.10                                                                     | 50.18                     | 323.33      | 34.96                                                                     |
| 25.16                     | 298.31      | 51.71                                                                     | 40.13                     | 313.28      | 33.49                                                                     | 59.75                     | 332.90      | 50.80                                                                     |
| 25.17                     | 298.32      | 52.74                                                                     | 40.18                     | 313.33      | 33.27                                                                     | 59.87                     | 333.02      | 51.11                                                                     |
| 30.07                     | 303.22      | 63.67                                                                     | 49.86                     | 323.01      | 49.42                                                                     | 69.60                     | 342.75      | 68.62                                                                     |
| 30.10                     | 303.25      | 64.50                                                                     | 49.89                     | 323.04      | 49.26                                                                     | 69.68                     | 342.83      | 68.85                                                                     |
| 30.16                     | 303.31      | 63.24                                                                     | 50.02                     | 323.17      | 46.39                                                                     | 74.61                     | 347.76      | 77.53                                                                     |
| 30.19                     | 303.34      | 62.97                                                                     | 50.04                     | 323.19      | 47.73                                                                     | 79.56                     | 352.71      | 91.08                                                                     |
| 40.23                     | 313.38      | 88.50                                                                     | 59.68                     | 332.83      | 66.58                                                                     | 79.56                     | 352.71      | 91.04                                                                     |
| 40.25                     | 313.40      | 88.57                                                                     | 59.73                     | 332.88      | 66.67                                                                     | 88.95                     | 362.10      | 116.2                                                                     |
| 50.01                     | 323.16      | 114.4                                                                     | 60.03                     | 333.18      | 65.13                                                                     | 88.95                     | 362.10      | 117.4                                                                     |
| 50.07                     | 323.22      | 110.0                                                                     | 60.03                     | 333.18      | 64.79                                                                     |                           |             |                                                                           |
| 50.09                     | 323.24      | 111.8                                                                     | 60.05                     | 333.20      | 64.76                                                                     |                           |             |                                                                           |
| 50.18                     | 323.33      | 111.9                                                                     | 60.06                     | 333.21      | 64.92                                                                     |                           |             |                                                                           |
| 50.20                     | 323.35      | 115.2                                                                     | 70.01                     | 343.16      | 86.81                                                                     |                           |             |                                                                           |
| 50.22                     | 323.37      | 112.5                                                                     | 70.11                     | 343.26      | 87.58                                                                     |                           |             |                                                                           |
| 60.45                     | 333.60      | 151.7                                                                     | 70.26                     | 343.41      | 92.14                                                                     |                           |             |                                                                           |
| 60.59                     | 333.74      | 151.4                                                                     | 70.27                     | 343.42      | 93.39                                                                     |                           |             |                                                                           |
| 70.65                     | 343.80      | 189.8                                                                     | 74.69                     | 347.84      | 101.3                                                                     |                           |             |                                                                           |
| 70.66                     | 343.81      | 190.8                                                                     | 74.71                     | 347.86      | 101.9                                                                     |                           |             |                                                                           |

|                           |             |                                                               |                           |             |                                                               |                           |             |                                                               |
|---------------------------|-------------|---------------------------------------------------------------|---------------------------|-------------|---------------------------------------------------------------|---------------------------|-------------|---------------------------------------------------------------|
| 80.46                     | 353.61      | 231.6                                                         | 79.37                     | 352.52      | 111.4                                                         |                           |             |                                                               |
| 80.50                     | 353.65      | 230.7                                                         | 79.39                     | 352.54      | 111.6                                                         |                           |             |                                                               |
| 88.94                     | 362.09      | 282.9                                                         | 90.86                     | 364.01      | 154.3                                                         |                           |             |                                                               |
| 88.97                     | 362.12      | 289.0                                                         | 90.99                     | 364.14      | 150.5                                                         |                           |             |                                                               |
| 89.08                     | 362.23      | 291.4                                                         |                           |             |                                                               |                           |             |                                                               |
| [EMIM][Tf <sub>2</sub> N] |             |                                                               | [HMIM][Tf <sub>2</sub> N] |             |                                                               | [OMIM][Tf <sub>2</sub> N] |             |                                                               |
| <i>T</i> / °C             | <i>T</i> /K | 10 <sup>12</sup> <i>D.</i><br>/m <sup>2</sup> s <sup>-1</sup> | <i>T</i> / °C             | <i>T</i> /K | 10 <sup>12</sup> <i>D.</i><br>/m <sup>2</sup> s <sup>-1</sup> | <i>T</i> / °C             | <i>T</i> /K | 10 <sup>12</sup> <i>D.</i><br>/m <sup>2</sup> s <sup>-1</sup> |
| 10.02                     | 283.17      | 16.50                                                         | 20.06                     | 293.21      | 11.39                                                         | 30.02                     | 303.17      | 14.50                                                         |
| 10.04                     | 283.19      | 16.20                                                         | 20.09                     | 293.24      | 11.59                                                         | 29.97                     | 303.12      | 14.56                                                         |
| 20.06                     | 293.21      | 24.97                                                         | 25.03                     | 298.18      | 14.54                                                         | 40.07                     | 313.22      | 22.63                                                         |
| 20.08                     | 293.23      | 25.20                                                         | 25.05                     | 298.20      | 14.68                                                         | 40.08                     | 313.23      | 22.27                                                         |
| 25.00                     | 298.15      | 30.53                                                         | 30.01                     | 303.16      | 18.29                                                         | 49.82                     | 322.97      | 34.25                                                         |
| 30.18                     | 303.33      | 36.49                                                         | 30.05                     | 303.20      | 18.18                                                         | 49.85                     | 323.00      | 31.96                                                         |
| 40.22                     | 313.37      | 52.35                                                         | 40.03                     | 313.18      | 28.05                                                         | 49.88                     | 323.03      | 33.21                                                         |
| 40.26                     | 313.41      | 52.55                                                         | 40.09                     | 313.24      | 28.26                                                         | 49.98                     | 323.13      | 33.42                                                         |
| 49.88                     | 323.03      | 71.00                                                         | 49.86                     | 323.01      | 40.98                                                         | 49.99                     | 323.14      | 33.23                                                         |
| 49.88                     | 323.03      | 72.68                                                         | 49.87                     | 323.02      | 41.11                                                         | 59.73                     | 332.88      | 46.36                                                         |
| 49.90                     | 323.05      | 67.49                                                         | 49.90                     | 323.05      | 39.85                                                         | 59.77                     | 332.92      | 46.69                                                         |
| 49.92                     | 323.07      | 71.58                                                         | 49.92                     | 323.07      | 39.24                                                         | 69.82                     | 342.97      | 63.58                                                         |
| 50.16                     | 323.31      | 69.69                                                         | 50.01                     | 323.16      | 41.41                                                         | 69.88                     | 343.03      | 62.64                                                         |
| 50.17                     | 323.32      | 68.89                                                         | 50.02                     | 323.17      | 40.48                                                         | 69.92                     | 343.07      | 63.01                                                         |
| 50.20                     | 323.35      | 69.91                                                         | 59.77                     | 332.92      | 56.14                                                         | 70.20                     | 343.35      | 66.80                                                         |
| 60.26                     | 333.41      | 90.40                                                         | 59.78                     | 332.93      | 55.26                                                         | 70.22                     | 343.37      | 63.81                                                         |
| 60.27                     | 333.42      | 90.22                                                         | 70.29                     | 343.44      | 78.55                                                         | 70.22                     | 343.37      | 64.51                                                         |
| 70.83                     | 343.98      | 117.1                                                         | 70.31                     | 343.46      | 79.87                                                         | 79.44                     | 352.59      | 85.96                                                         |
| 70.89                     | 344.04      | 118.2                                                         | 79.87                     | 353.02      | 99.57                                                         | 79.53                     | 352.68      | 84.90                                                         |
| 80.75                     | 353.90      | 144.0                                                         | 80.10                     | 353.25      | 99.74                                                         | 79.58                     | 352.73      | 85.15                                                         |
| 80.77                     | 353.92      | 144.1                                                         | 90.26                     | 363.41      | 139.0                                                         | 89.01                     | 362.16      | 116.8                                                         |
| 90.23                     | 363.38      | 178.7                                                         | 90.28                     | 363.43      | 139.8                                                         | 89.02                     | 362.17      | 111.1                                                         |
| 90.28                     | 363.43      | 175.7                                                         |                           |             |                                                               | 90.23                     | 363.38      | 119.8                                                         |
|                           |             |                                                               |                           |             |                                                               | 90.26                     | 363.41      | 120.8                                                         |

Table S7. Velocity Correlation ( $f_{ij}$ ), and Distinct Diffusion ( $D_{ij}^d$ ) Coefficients, Laity Resistance Coefficients and Nernst-Einstein  $\Delta$

| [EMIM][Tf <sub>2</sub> N] |                |            |          |          |                |            |            |                          |                    |          |          |                           |
|---------------------------|----------------|------------|----------|----------|----------------|------------|------------|--------------------------|--------------------|----------|----------|---------------------------|
| $T/K$                     | $p/\text{MPa}$ | $f_{++}^a$ | $f_{--}$ | $f_{+-}$ | $D_{++}^d{}^b$ | $D_{--}^d$ | $D_{+-}^d$ | $\Delta$                 | $r_{++}^c$         | $r_{--}$ | $r_{+-}$ | $r_{+-}^2/(r_{++}r_{--})$ |
| 273.15                    | 0.1            | -1.84      |          | -1.09    | -14.54         |            | -8.61      |                          | 36.1               |          | 214.7    |                           |
| 278.15                    | 0.1            | -2.30      |          | -1.41    | -18.13         |            | -11.08     |                          | 31.1               |          | 169.9    |                           |
| 283.15                    | 0.1            | -2.86      | -3.43    | -1.78    | -22.42         | -26.92     | -13.97     | 0.237                    | 26.3               | 153      | 137.1    |                           |
| 288.15                    | 0.1            | -3.52      | -4.33    | -2.22    | -27.48         | -33.87     | -17.32     | 0.239                    | 22.2               | 123      | 112.6    | 4.7                       |
| 293.15                    | 0.1            | -4.29      | -5.39    | -2.71    | -33.42         | -41.97     | -21.13     | 0.242                    | 18.7               | 99.8     | 93.8     | 4.7                       |
| 298.15                    | 0.1            | -5.19      | -6.60    | -3.28    | -40.31         | -51.26     | -25.43     | 0.246                    | 15.7               | 82.3     | 79.3     | 4.7                       |
| 303.15                    | 0.1            | -6.24      | -7.99    | -3.91    | -48.25         | -61.84     | -30.23     | 0.246                    | 13.2               | 68.7     | 67.8     | 4.9                       |
| 313.15                    | 0.1            | -8.79      | -11.32   | -5.38    | -67.59         | -86.99     | -41.35     | 0.250                    | 9.40               | 49.5     | 51.2     | 5.1                       |
| 323.15                    | 0.1            | -12.05     | -15.42   | -7.14    | -92.03         | -117.7     | -54.53     | 0.261                    | 6.75               | 37.0     | 40.1     | 5.6                       |
| 333.15                    | 0.1            | -16.09     | -20.33   | -9.20    | -122.1         | -154.2     | -69.79     | 0.273                    | 4.90               | 28.6     | 32.3     | 6.4                       |
| 343.16                    | 0.1            | -20.99     | -26.09   | -11.56   | -158.1         | -196.6     | -87.12     | 0.285                    | 3.57               | 22.7     | 26.6     | 7.4                       |
| 353.15                    | 0.1            | -26.78     | -32.69   | -14.22   | -200.4         | -244.7     | -106.4     | 0.296                    | 2.62               | 18.5     | 22.4     | 8.7                       |
| 363.15                    | 0.1            | -33.50     | -40.13   | -17.18   | -249.1         | -298.4     | -127.7     | 0.307                    | 1.92               | 15.4     | 19.2     | 10                        |
| $u/\%$                    |                | 9          | 4        | 1        | 9              | 4          | 1          | <b>0.05</b> <sup>e</sup> | 24-43 <sup>d</sup> | 8        | 1        |                           |

| [BMIM][Tf <sub>2</sub> N] |               |                                     |                        |                        |                                                  |                                     |                                     |                          |                                     |                        |                        |                                                                                        |
|---------------------------|---------------|-------------------------------------|------------------------|------------------------|--------------------------------------------------|-------------------------------------|-------------------------------------|--------------------------|-------------------------------------|------------------------|------------------------|----------------------------------------------------------------------------------------|
| <i>T</i> /K               | <i>p</i> /MPa | <i>f</i> <sub>++</sub> <sup>a</sup> | <i>f</i> <sub>--</sub> | <i>f</i> <sub>+-</sub> | <i>D</i> <sup>d</sup> <sub>++</sub> <sup>b</sup> | <i>D</i> <sup>d</sup> <sub>--</sub> | <i>D</i> <sup>d</sup> <sub>+-</sub> | $\Delta$                 | <i>r</i> <sub>++</sub> <sup>c</sup> | <i>r</i> <sub>--</sub> | <i>r</i> <sub>+-</sub> | <i>r</i> <sub>+-</sub> <sup>2</sup> /( <i>r</i> <sub>++</sub> <i>r</i> <sub>--</sub> ) |
| 243.15                    | 0.1           |                                     |                        | -0.0358                |                                                  |                                     | -0.254                              |                          |                                     |                        | 7057                   |                                                                                        |
| 253.15                    | 0.1           |                                     |                        | -0.107                 |                                                  |                                     | -0.756                              |                          |                                     |                        | 2471                   |                                                                                        |
| 263.15                    | 0.1           |                                     |                        | -0.257                 |                                                  |                                     | -1.80                               |                          |                                     |                        | 1076                   |                                                                                        |
| 273.15                    | 0.1           |                                     |                        | -0.528                 |                                                  |                                     | -3.67                               |                          |                                     |                        | 548                    |                                                                                        |
| 283.15                    | 0.1           |                                     |                        | -0.963                 |                                                  |                                     | -6.66                               |                          |                                     |                        | 314                    |                                                                                        |
| 288.15                    | 0.1           | -2.52                               | -3.15                  | -1.26                  | -17.4                                            | -21.7                               | -8.65                               | 0.358                    | 29.9                                | 122.9                  | 246                    | 16                                                                                     |
| 298.15                    | 0.1           | -3.93                               | -5.12                  | -2.02                  | -26.9                                            | -35.1                               | -13.8                               | 0.356                    | 22.1                                | 77.1                   | 159                    | 15                                                                                     |
| 303.15                    | 0.1           | -4.82                               | -6.38                  | -2.50                  | -32.9                                            | -43.6                               | -17.0                               | 0.356                    | 18.7                                | 62.5                   | 131                    | 15                                                                                     |
| 313.15                    | 0.1           | -7.06                               | -9.50                  | -3.67                  | -47.8                                            | -64.4                               | -24.9                               | 0.358                    | 13.5                                | 42.8                   | 92.9                   | 15                                                                                     |
| 323.15                    | 0.1           | -9.96                               | -13.51                 | -5.15                  | -67.1                                            | -91.0                               | -34.7                               | 0.362                    | 9.82                                | 30.6                   | 68.7                   | 16                                                                                     |
| 333.15                    | 0.1           | -13.61                              | -18.47                 | -6.97                  | -91.1                                            | -124                                | -46.6                               | 0.366                    | 7.23                                | 22.8                   | 52.7                   | 17                                                                                     |
| 343.15                    | 0.1           | -18.10                              | -24.46                 | -9.15                  | -120.3                                           | -163                                | -60.8                               | 0.370                    | 5.40                                | 17.6                   | 41.6                   | 18                                                                                     |
| 353.15                    | 0.1           | -23.49                              | -31.49                 | -11.69                 | -155.1                                           | -208                                | -77.2                               | 0.375                    | 4.09                                | 13.9                   | 33.7                   | 20                                                                                     |
| 363.15                    | 0.1           | -29.82                              | -39.60                 | -14.61                 | -195.7                                           | -260                                | -95.8                               | 0.379                    | 3.14                                | 11.3                   | 27.9                   | 22                                                                                     |
| <i>u</i> /%               |               | 7-11                                | 4                      | 1                      | 7-11                                             | 4                                   | 1                                   | <b>0.04</b> <sup>e</sup> | 36-30 <sup>d</sup>                  | 11 <sup>d</sup>        | 1                      |                                                                                        |
| 298.15                    | 0.1           | -3.87                               | -5.13                  | -2.03                  | -26.5                                            | -35.1                               | -13.9                               | 0.349                    | 158                                 | 24.0                   | 78.1                   | 13                                                                                     |
| 298.15                    | 12.5          | -3.36                               | -4.39                  | -1.77                  | -23.2                                            | -30.2                               | -12.2                               | 0.346                    | 180                                 | 27.4                   | 92.9                   | 13                                                                                     |

|        |       |       |        |        |       |       |       |       |      |      |      |    |
|--------|-------|-------|--------|--------|-------|-------|-------|-------|------|------|------|----|
| 298.15 | 25.0  | -2.93 | -3.76  | -1.54  | -20.3 | -26.1 | -10.7 | 0.342 | 206  | 31.2 | 110  | 12 |
| 298.15 | 37.5  | -2.56 | -3.23  | -1.34  | -17.8 | -22.5 | -9.35 | 0.339 | 235  | 35.4 | 130  | 12 |
| 298.15 | 50.0  | -2.23 | -2.78  | -1.17  | -15.7 | -19.5 | -8.20 | 0.337 | 268  | 40.1 | 152  | 12 |
| 298.15 | 75.0  |       |        | -0.894 |       |       | -6.33 |       | 347  |      |      |    |
| 298.15 | 100.0 |       |        | -0.687 |       |       | -4.91 |       | 448  |      |      |    |
| 298.15 | 125.0 |       |        | -0.531 |       |       | -3.82 |       | 575  |      |      |    |
| 298.15 | 150.0 |       |        | -0.412 |       |       | -2.99 |       | 735  |      |      |    |
| 298.15 | 175.0 |       |        | -0.321 |       |       | -2.35 |       | 936  |      |      |    |
| 298.15 | 200.0 |       |        | -0.252 |       |       | -1.85 |       | 1187 |      |      |    |
| 323.15 | 0.1   | -9.97 | -13.52 | -5.13  | -67.1 | -91.0 | -34.6 | 0.364 | 69.0 | 9.68 | 30.4 | 16 |
| 323.15 | 12.5  | -8.84 | -11.90 | -4.58  | -60.0 | -80.7 | -31.0 | 0.360 | 76.8 | 11.0 | 35.0 | 15 |
| 323.15 | 25.0  | -7.85 | -10.49 | -4.08  | -53.6 | -71.6 | -27.9 | 0.356 | 85.6 | 12.5 | 40.2 | 15 |
| 323.15 | 37.5  | -6.98 | -9.28  | -3.65  | -47.9 | -63.7 | -25.0 | 0.353 | 95.3 | 14.1 | 46.0 | 14 |
| 323.15 | 50.0  | -6.22 | -8.22  | -3.26  | -43.0 | -56.7 | -22.5 | 0.350 | 105  | 15.9 | 52.3 | 14 |
| 323.15 | 75.0  | -4.96 | -6.49  | -2.62  | -34.6 | -45.3 | -18.2 | 0.346 | 131  | 20.0 | 67.0 | 13 |
| 323.15 | 100.0 | -3.98 | -5.18  | -2.11  | -28.1 | -36.5 | -14.9 | 0.342 | 161  | 25.0 | 84.4 | 12 |
| 323.15 | 125.0 | -3.22 |        | -1.71  | -22.9 |       |       |       | 197  | 30.8 |      |    |
| 323.15 | 150.0 | -2.62 |        | -1.39  | -18.8 |       |       |       | 240  | 37.6 |      |    |
| 323.15 | 175.0 | -2.14 |        | -1.13  | -15.5 |       |       |       | 292  | 45.4 |      |    |

|        |       |        |        |        |        |        |        |       |      |      |      |    |
|--------|-------|--------|--------|--------|--------|--------|--------|-------|------|------|------|----|
| 348.15 | 0.10  | -21.05 | -28.12 | -10.15 | -139.4 | -186.3 | -67.23 | 0.387 | 38.2 | 3.96 | 15.0 | 25 |
| 348.15 | 12.5  | -18.97 | -25.29 | -9.21  | -126.6 | -168.8 | -61.44 | 0.384 | 41.8 | 4.48 | 16.4 | 24 |
| 348.15 | 25.0  | -17.11 | -22.77 | -8.36  | -115.0 | -153.0 | -56.15 | 0.381 | 45.7 | 5.06 | 18.3 | 23 |
| 348.15 | 37.5  | -15.46 | -20.55 | -7.59  | -104.6 | -139.0 | -51.36 | 0.378 | 50.0 | 5.69 | 20.4 | 22 |
| 348.15 | 50.0  | -14.00 | -18.59 | -6.91  | -95.2  | -126.5 | -47.01 | 0.376 | 54.6 | 6.37 | 22.6 | 21 |
| 348.15 | 75.0  | -11.52 | -15.31 | -5.74  | -79.3  | -105.3 | -39.48 | 0.372 | 65.0 | 7.92 | 27.6 | 19 |
| 348.15 | 100.0 | -9.53  | -12.71 | -4.78  | -66.3  | -88.3  | -33.26 | 0.370 | 77.2 | 9.73 | 33.2 | 18 |
| 348.15 | 125.0 | -7.94  | -10.63 | -4.01  | -55.7  | -74.6  | -28.1  | 0.369 | 91.4 | 11.8 | 39.3 | 18 |
| 348.15 | 150.0 | -6.644 | -8.97  | -3.37  | -47.0  | -63.5  | -23.8  | 0.369 | 108  | 14.2 | 46.0 | 18 |
| 348.15 | 175.0 | -5.594 | -7.63  | -2.84  | -39.9  | -54.4  | -20.3  | 0.370 | 127  | 16.8 | 52.9 | 18 |
| 348.15 | 200.0 | -4.734 | -6.54  | -2.41  | -34.0  | -47.0  | -17.3  | 0.373 | 149  | 19.8 | 59.9 | 19 |
| 348.15 | 225.0 | -4.030 | -5.65  | -2.04  | -29.1  | -40.8  | -14.8  | 0.377 | 174  | 23.0 | 66.7 | 20 |
| 348.15 | 250.0 | -3.45  |        |        | -25.1  |        |        |       | 202  | 26.4 |      |    |



| [HMIM][Tf <sub>2</sub> N] |               |                                     |                        |                        |                                       |                                     |                                     |                          |                                     |                        |                        |                                                                                        |
|---------------------------|---------------|-------------------------------------|------------------------|------------------------|---------------------------------------|-------------------------------------|-------------------------------------|--------------------------|-------------------------------------|------------------------|------------------------|----------------------------------------------------------------------------------------|
| <i>T</i> /K               | <i>p</i> /MPa | <i>f</i> <sub>++</sub> <sup>a</sup> | <i>f</i> <sub>--</sub> | <i>f</i> <sub>+-</sub> | <i>D</i> <sub>++</sub> <sup>d b</sup> | <i>D</i> <sub>--</sub> <sup>d</sup> | <i>D</i> <sub>+-</sub> <sup>d</sup> | $\Delta$                 | <i>r</i> <sub>++</sub> <sup>c</sup> | <i>r</i> <sub>--</sub> | <i>r</i> <sub>+-</sub> | <i>r</i> <sub>+-</sub> <sup>2</sup> /( <i>r</i> <sub>++</sub> <i>r</i> <sub>--</sub> ) |
| 243.15                    | 0.1           |                                     |                        | -0.019                 |                                       |                                     | -0.119                              |                          |                                     |                        | 15894                  |                                                                                        |
| 253.15                    | 0.1           |                                     |                        | -0.060                 |                                       |                                     | -0.377                              |                          |                                     |                        | 5221                   |                                                                                        |
| 263.15                    | 0.1           |                                     |                        | -0.153                 |                                       |                                     | -0.958                              |                          |                                     |                        | 2138                   |                                                                                        |
| 273.15                    | 0.1           |                                     |                        | -0.331                 |                                       |                                     | -2.07                               |                          |                                     |                        | 1029                   |                                                                                        |
| 283.15                    | 0.1           |                                     |                        | -0.637                 |                                       |                                     | -3.95                               |                          |                                     |                        | 558.6                  |                                                                                        |
| 293.15                    | 0.1           | -2.51                               | -3.06                  | -1.11                  | -15.43                                | -18.80                              | -6.86                               | 0.412                    | 29.4                                | 92.9                   | 332.9                  | 41                                                                                     |
| 298.15                    | 0.1           | -3.24                               | -3.89                  | -1.43                  | -19.89                                | -23.89                              | -8.78                               | 0.412                    | 22.2                                | 75.9                   | 264.5                  | 42                                                                                     |
| 303.15                    | 0.1           | -4.12                               | -4.90                  | -1.81                  | -25.18                                | -29.97                              | -11.05                              | 0.412                    | 17.2                                | 62.2                   | 213.6                  | 43                                                                                     |
| 313.15                    | 0.1           | -6.33                               | -7.51                  | -2.76                  | -38.45                                | -45.59                              | -16.78                              | 0.413                    | 11.2                                | 42.0                   | 145.3                  | 45                                                                                     |
| 323.15                    | 0.1           | -9.22                               | -11.04                 | -4.02                  | -55.60                                | -66.62                              | -24.26                              | 0.416                    | 7.99                                | 28.8                   | 103.7                  | 47                                                                                     |
| 333.15                    | 0.1           | -12.83                              | -15.69                 | -5.62                  | -76.88                                | -94.03                              | -33.69                              | 0.418                    | 6.14                                | 20.1                   | 76.98                  | 48                                                                                     |
| 343.15                    | 0.1           | -17.21                              | -21.63                 | -7.60                  | -102.4                                | -128.7                              | -45.23                              | 0.421                    | 5.00                                | 14.2                   | 59.06                  | 49                                                                                     |
| 353.15                    | 0.1           | -22.36                              | -29.03                 | -9.98                  | -132.2                                | -171.6                              | -59.01                              | 0.424                    | 4.25                                | 10.2                   | 46.59                  | 50                                                                                     |
| 363.15                    | 0.1           | -28.28                              | -38.07                 | -12.79                 | -166.1                                | -223.5                              | -75.13                              | 0.427                    | 3.75                                | 7.37                   | 37.63                  | 51                                                                                     |
| <i>u</i> /%               |               | 6-10 <sup>d</sup>                   | 4                      | 1                      | 6-10 <sup>d</sup>                     | 4                                   | 1                                   | <b>0.03</b> <sup>e</sup> | 50                                  | 20                     | 1                      |                                                                                        |

| [OMIM][Tf <sub>2</sub> N] |               |                                     |                       |                       |                                                  |                                     |                                     |                          |                                     |                       |                       |                                                                                       |
|---------------------------|---------------|-------------------------------------|-----------------------|-----------------------|--------------------------------------------------|-------------------------------------|-------------------------------------|--------------------------|-------------------------------------|-----------------------|-----------------------|---------------------------------------------------------------------------------------|
| <i>T</i> /K               | <i>p</i> /MPa | <i>f</i> <sub>++</sub> <sup>a</sup> | <i>f</i> <sub>-</sub> | <i>f</i> <sub>+</sub> | <i>D</i> <sup>d</sup> <sub>++</sub> <sup>b</sup> | <i>D</i> <sup>d</sup> <sub>--</sub> | <i>D</i> <sup>d</sup> <sub>+-</sub> | $\Delta$                 | <i>r</i> <sub>++</sub> <sup>c</sup> | <i>r</i> <sub>-</sub> | <i>r</i> <sub>+</sub> | <i>r</i> <sub>+-</sub> <sup>2</sup> /( <i>r</i> <sub>++</sub> <i>r</i> <sub>-</sub> ) |
| 273.15                    | 0.1           |                                     |                       | -0.227                |                                                  |                                     | -1.28                               |                          |                                     |                       | 1711                  |                                                                                       |
| 283.15                    | 0.1           |                                     |                       | -0.459                |                                                  |                                     | -2.58                               |                          |                                     |                       | 884.4                 |                                                                                       |
| 293.15                    | 0.1           |                                     |                       | -0.836                |                                                  |                                     | -4.66                               |                          |                                     |                       | 506.6                 |                                                                                       |
| 298.15                    | 0.1           | -2.81                               |                       | -1.09                 | -15.60                                           |                                     | -6.07                               |                          | 12.5                                |                       | 395.6                 |                                                                                       |
| 303.15                    | 0.1           | -3.58                               | -4.29                 | -1.40                 | -19.80                                           | -23.74                              | -7.76                               | 0.467                    | 11.4                                | 31.3                  | 314.6                 | 277                                                                                   |
| 313.15                    | 0.1           | -5.58                               | -6.59                 | -2.20                 | -30.68                                           | -36.25                              | -12.1                               | 0.461                    | 8.50                                | 24.7                  | 208.3                 | 206                                                                                   |
| 323.15                    | 0.1           | -8.31                               | -9.78                 | -3.28                 | -45.39                                           | -53.43                              | -17.9                               | 0.460                    | 5.91                                | 17.7                  | 145.3                 | 201                                                                                   |
| 333.15                    | 0.1           | -11.90                              | -14.07                | -4.67                 | -64.56                                           | -76.32                              | -25.3                               | 0.463                    | 3.99                                | 12.1                  | 105.8                 | 233                                                                                   |
| 343.15                    | 0.1           | -16.47                              | -19.67                | -6.42                 | -88.75                                           | -106.0                              | -34.6                               | 0.468                    | 2.63                                | 7.86                  | 79.84                 | 308                                                                                   |
| 353.15                    | 0.1           | -22.13                              | -26.83                | -8.55                 | -118.5                                           | -143.6                              | -45.8                               | 0.474                    | 1.71                                | 4.84                  | 62.07                 | 467                                                                                   |
| 363.15                    | 0.1           | -28.98                              | -35.78                | -11.11                | -154.1                                           | -190.2                              | -59.1                               | 0.481                    | 1.07                                | 2.69                  | 49.50                 | 850                                                                                   |
| <i>u</i> /%               |               | 5                                   | 4                     | 1                     | 5                                                | 4                                   | 1                                   | <b>0.03</b> <sup>e</sup> | 113-190 <sup>d</sup>                | 43-76 <sup>d</sup>    | 1                     |                                                                                       |

Units: <sup>a</sup> *f*<sub>ij</sub>: 10<sup>-15</sup> m<sup>5</sup>/(mol·s). <sup>b</sup> *D*<sub>ij</sub><sup>d</sup>: 10<sup>-12</sup> m<sup>2</sup>/s. <sup>c</sup> *r*<sub>ij</sub>: 10<sup>12</sup> J·s·m<sup>-2</sup>·mol<sup>-1</sup>

<sup>d</sup> The uncertainties vary: the first entry is for the datum at the top of the column, the second is that for the datum at the bottom.

<sup>e</sup> Actual uncertainty, not a percentage.

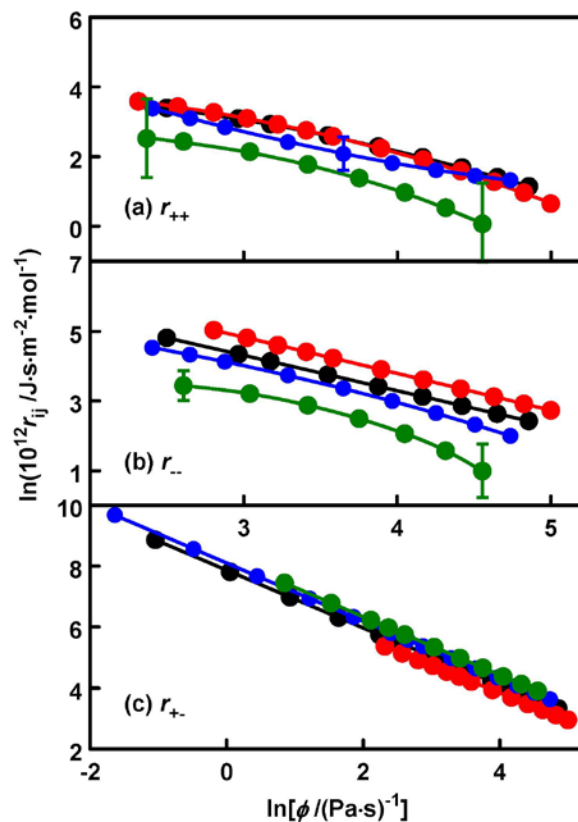

**Fig. S1** Stokes-Einstein-Sutherland-type plots for the Laity resistance coefficients for [RMIM][Tf<sub>2</sub>N] salts at 0.1 MPa.  $\phi$  is the fluidity (reciprocal viscosity). Symbols as in Fig. 9. Note the difference between the scale of the x axis for the upper two panels and the lowest.
